# Supplementary material for: Mitigating sarcoplasmic reticulum stress limits disuse-induced muscle loss in hindlimb unloaded mice
Source: PubMed Central journal article supplement (PMC9273600; doi:10.1038/s41526-022-00211-w), 2022-07-11

## **Supplementary Information**

# **Mitigating sarcoplasmic reticulum stress limits disuse- induced muscle loss in hindlimb unloaded mice**

Amir Ali Khan<sup>1</sup>, Muhammad Tehsil Gul<sup>1</sup>, Asima Karim<sup>2</sup>, Anu Ranade<sup>2</sup>, Muhammad Azeem<sup>3</sup>, Zainab Ibrahim<sup>4</sup>, Gopika Ramachandran<sup>4</sup>, Vidhya A Nair<sup>4</sup>, Firdos Ahmad<sup>2,4</sup>, Adel Elmoselhi<sup>2,4</sup>, \*Rizwan Qaisar<sup>2,4</sup>

<sup>1</sup>Department of Applied Biology, College of Sciences, University of Sharjah, Sharjah 27272, UAE

<sup>2</sup>Department of Basic Medical Sciences, College of Medicine, University of Sharjah, Sharjah 27272, UAE

<sup>3</sup>Department of Applied Physics and Astronomy, College of Sciences, University of Sharjah 27272, UAE

<sup>4</sup>Cardiovascular research group, Sharjah Institute for Medical Research, University of Sharjah, Sharjah 27272, UAE

### **Corresponding author**

Rizwan Qaisar, MBBS. Ph.D.

*Department of Basic Medical Sciences*

*College of Medicine*

*University of Sharjah, Sharjah, UAE*

*Phone: +971 6 505 7254*

*ORCID: 0000-0001-8485-7172*

*E-mail: [rqaisar@sharjah.ac.ae](mailto:rqaisar@sharjah.ac.ae)*

Figures legends for supplementary files  
 Supplementary figure 1.

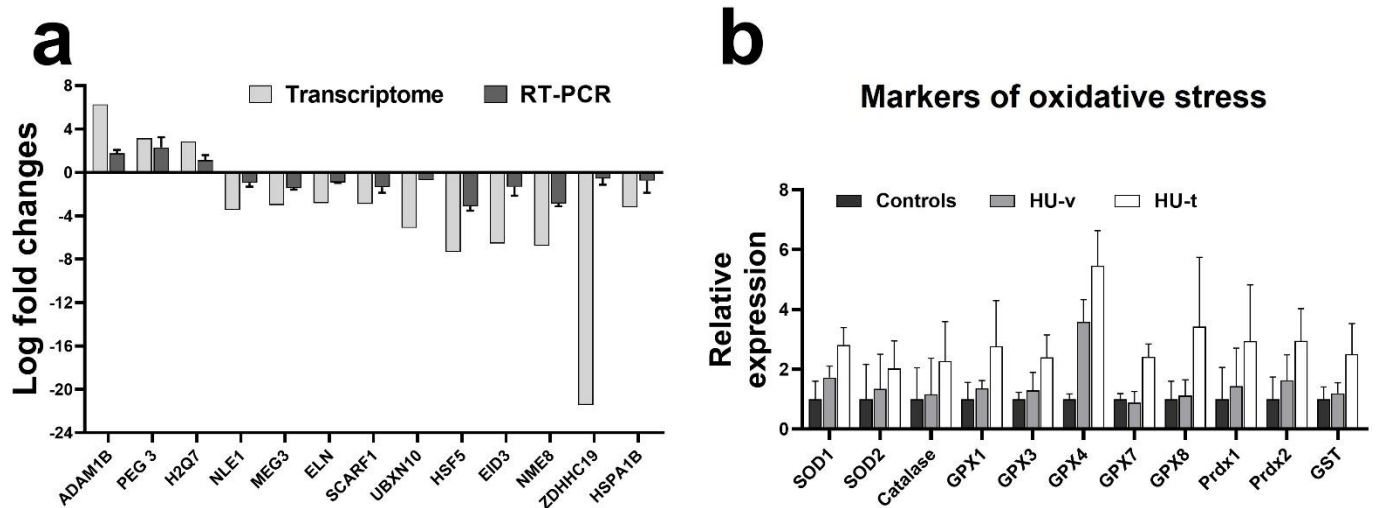

Supplementary figure 1.

Title: Validation of transcriptome data.

**Caption:** Transcriptome and mRNA expression of randomly selected genes (a) and the transcriptome expressions of the markers of oxidative stress (b) in ground-based controls and the hindlimb-unloaded mice treated with vehicle (HU-v) or 4-PBA (HU-t). Data is presented as mean  $\pm$  SD, (n = 3 / group).

(ADAM1B; ADAM Metallopeptidase Domain 1B, PEG 3; paternally expressed 3, H2Q7; histocompatibility 2, Q region locus 7, NLE1; notchless protein homolog 1, MEG3; maternally expressed 3, ELN; elastin, SCARF1; Scavenger Receptor Class F Member 1, UBXN10; UBX domain protein 19, HSF5; heat shock transcription factor 5, EID3; EP300 Interacting Inhibitor Of Differentiation 3, NME8; NME family member 8, ZDHHC19; Zinc Finger DHHC-Type Palmitoyltransferase 19, HSPA1B; heat shock protein family A member 1B, SOD1; superoxide dismutase 1, SOD2; superoxide dismutase 2, GPX1; glutathione peroxidase 1, GPX3; glutathione peroxidase 3, GPX4; glutathione peroxidase 4, GPX7, glutathione peroxidase 7, GPX8; glutathione peroxidase 8, Prdx1; peroxiredoxin 1, Prdx2; peroxiredoxin 2, GST; glutathione s-transferase).

## Supplementary figure 2.

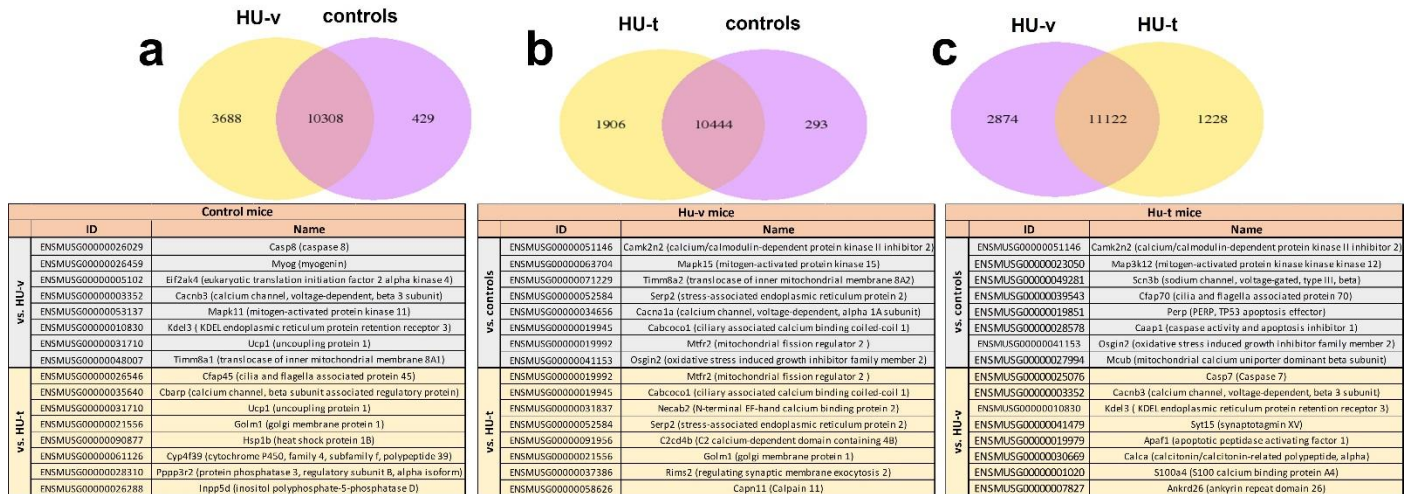

## Supplementary figure 2.

**Title:** Uniquely expressed genes.

**Caption:** The number of uniquely expressed genes in the hindlimb-unloaded mice treated with vehicle (HU-v) vs. ground-based controls (a), hindlimb-unloaded mice treated with 4-PBA (HU-t) vs. ground-based controls (b), and HU-v vs. HU-t mice (c). The corresponding tables indicate selected genes that were uniquely expressed in each comparison (n = 8-11 / group). The full list of uniquely expressed genes is available in supplementary table 3.

Supplementary figure 3.

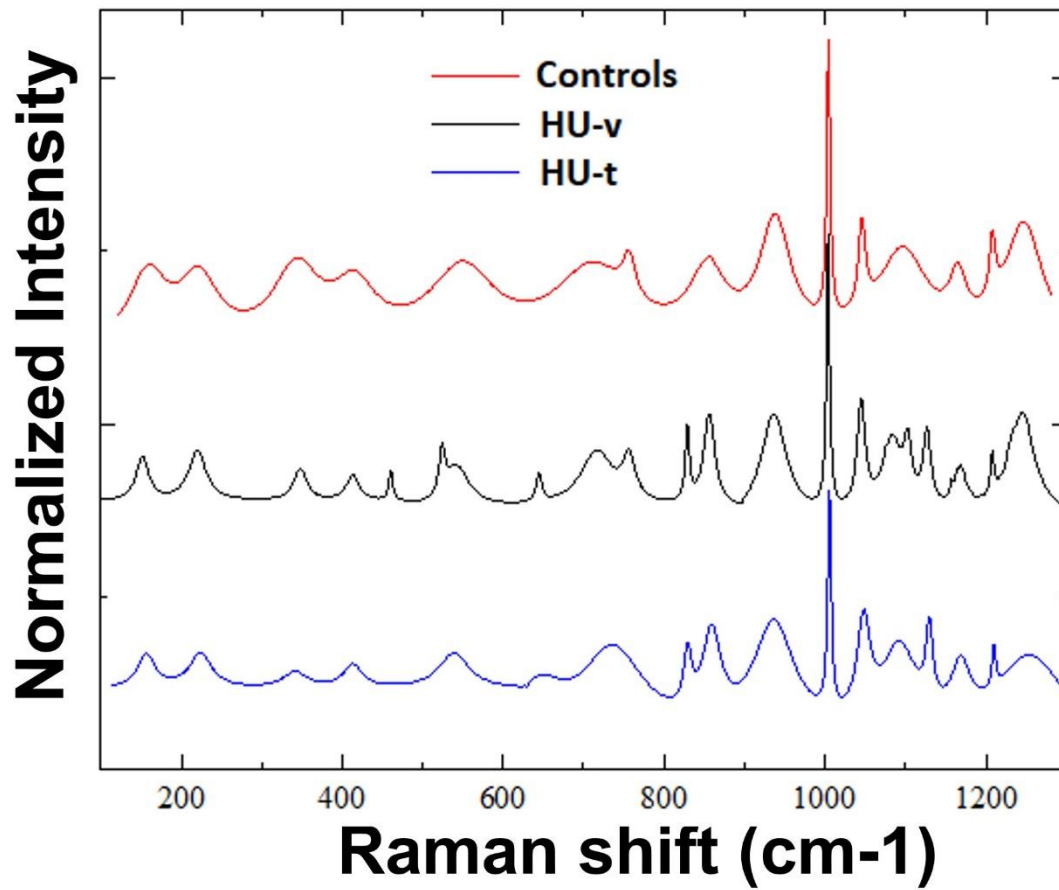

**Title:** Raman spectroscopy

**Caption:** Experimentally obtained Raman spectra from the gastrocnemius muscles of the control (red line), HU-v (black line), and HU-t (blue line) mice. (HU-v; hindlimb-unloaded mice treated with vehicle, HU-t; hindlimb-unloaded mice treated with 4-PBA).

Fig 1. Full western blot image.

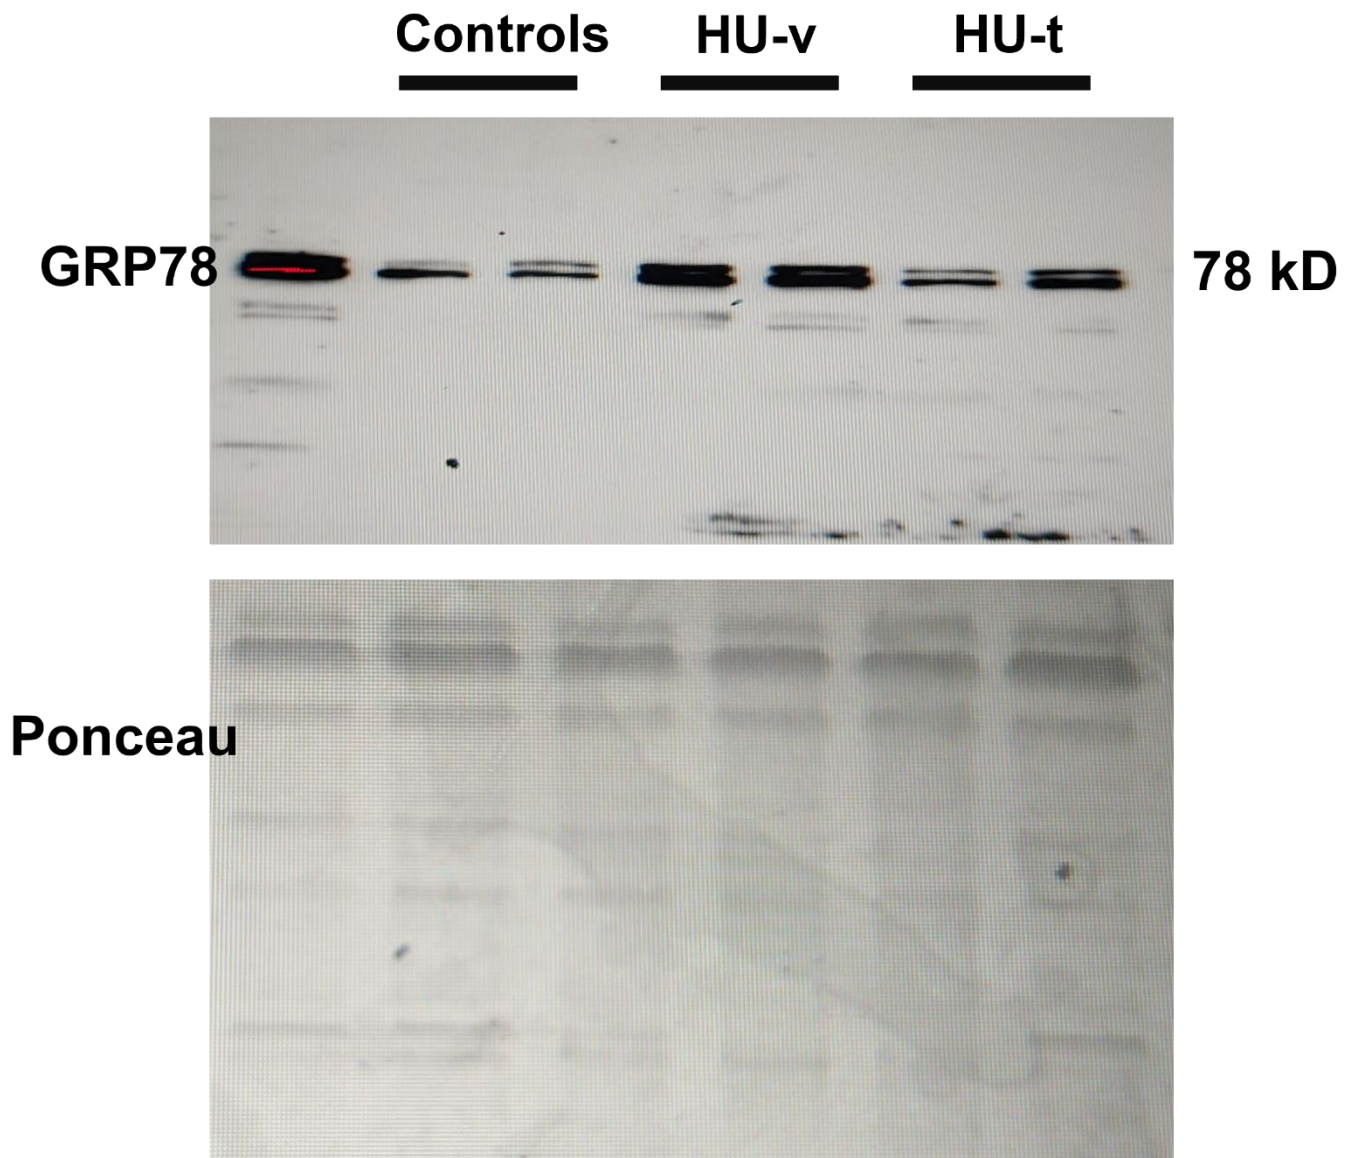

Supplement: 41526_2022_211_MOESM2_ESM.pdf [file 41526_2022_211_MOESM2_ESM.pdf]
